# Supplementary material for: Restriction of arginine induces antibiotic tolerance in Staphylococcus aureus
Source: Springer Nature journal article supplement (doi:10.1038/s41467-024-51144-9), 2024-08-07
Supplement: MOESM7 [file 41467_2024_51144_MOESM7_ESM.pdf › 41467_2024_51144_MOESM7_ESM.pdf]

Reporting Summary

Nature Portfolio wishes to improve the reproducibility of the work that we publish. This form provides structure for consistency and transparency in reporting. For further information on Nature Portfolio policies, see our [Editorial Policies](#) and the [Editorial Policy Checklist](#).

Statistics

For all statistical analyses, confirm that the following items are present in the figure legend, table legend, main text, or Methods section.

|                                     |                                                                                                                                                                                                                                                                                                |
|-------------------------------------|------------------------------------------------------------------------------------------------------------------------------------------------------------------------------------------------------------------------------------------------------------------------------------------------|
| n/a                                 | Confirmed                                                                                                                                                                                                                                                                                      |
| <input type="checkbox"/>            | <input checked="" type="checkbox"/> The exact sample size ( <i>n</i> ) for each experimental group/condition, given as a discrete number and unit of measurement                                                                                                                               |
| <input type="checkbox"/>            | <input checked="" type="checkbox"/> A statement on whether measurements were taken from distinct samples or whether the same sample was measured repeatedly                                                                                                                                    |
| <input type="checkbox"/>            | <input checked="" type="checkbox"/> The statistical test(s) used AND whether they are one- or two-sided<br><i>Only common tests should be described solely by name; describe more complex techniques in the Methods section.</i>                                                               |
| <input checked="" type="checkbox"/> | <input type="checkbox"/> A description of all covariates tested                                                                                                                                                                                                                                |
| <input type="checkbox"/>            | <input checked="" type="checkbox"/> A description of any assumptions or corrections, such as tests of normality and adjustment for multiple comparisons                                                                                                                                        |
| <input type="checkbox"/>            | <input checked="" type="checkbox"/> A full description of the statistical parameters including central tendency (e.g. means) or other basic estimates (e.g. regression coefficient) AND variation (e.g. standard deviation) or associated estimates of uncertainty (e.g. confidence intervals) |
| <input type="checkbox"/>            | <input checked="" type="checkbox"/> For null hypothesis testing, the test statistic (e.g. <i>F</i> , <i>t</i> , <i>r</i> ) with confidence intervals, effect sizes, degrees of freedom and <i>P</i> value noted<br><i>Give P values as exact values whenever suitable.</i>                     |
| <input checked="" type="checkbox"/> | <input type="checkbox"/> For Bayesian analysis, information on the choice of priors and Markov chain Monte Carlo settings                                                                                                                                                                      |
| <input checked="" type="checkbox"/> | <input type="checkbox"/> For hierarchical and complex designs, identification of the appropriate level for tests and full reporting of outcomes                                                                                                                                                |
| <input checked="" type="checkbox"/> | <input type="checkbox"/> Estimates of effect sizes (e.g. Cohen's <i>d</i> , Pearson's <i>r</i> ), indicating how they were calculated                                                                                                                                                          |

Our web collection on [statistics for biologists](#) contains articles on many of the points above.

Software and code

Policy information about [availability of computer code](#)

|                 |                                                                                                                                                                                                                                                |
|-----------------|------------------------------------------------------------------------------------------------------------------------------------------------------------------------------------------------------------------------------------------------|
| Data collection | We did not generate any custom software or algorithm for this study.                                                                                                                                                                           |
| Data analysis   | We did not generate any custom software or algorithm for this study. MaxQuant v2.0.1.0 and Perseus v1.6.15.0 were used for proteomic analysis. TRANSIT v3.2.7 was used for TnSeq analysis. GraphPad Prism v10.1.2 was used for other analyzes. |

For manuscripts utilizing custom algorithms or software that are central to the research but not yet described in published literature, software must be made available to editors and reviewers. We strongly encourage code deposition in a community repository (e.g. GitHub). See the Nature Portfolio [guidelines for submitting code & software](#) for further information.

Data

Policy information about [availability of data](#)

All manuscripts must include a [data availability statement](#). This statement should provide the following information, where applicable:

- Accession codes, unique identifiers, or web links for publicly available datasets
- A description of any restrictions on data availability
- For clinical datasets or third party data, please ensure that the statement adheres to our [policy](#)

The data supporting the findings of this study are included in the manuscript, supplemental material, or as part of the source data provided with this paper within the Source Data file. Data pertaining toThe TnSeq data generated in this study have been deposited in the National Center for Biotechnology Information (NCBI) Gene Expression Omnibus (GEO) under accession number: GSE267626 [https://www.ncbi.nlm.nih.gov/geo/query/acc.cgi?acc=GSE267626]. The mass spectrometry

## Research involving human participants, their data, or biological material

Policy information about studies with [human participants or human data](#). See also policy information about [sex, gender \(identity/presentation\), and sexual orientation](#) and [race, ethnicity and racism](#).

|                                                                    |                                     |
|--------------------------------------------------------------------|-------------------------------------|
| Reporting on sex and gender                                        | N/A Human participants not involved |
| Reporting on race, ethnicity, or other socially relevant groupings | N/A                                 |
| Population characteristics                                         | N/A                                 |
| Recruitment                                                        | N/A                                 |
| Ethics oversight                                                   | N/A                                 |

Note that full information on the approval of the study protocol must also be provided in the manuscript.

## Field-specific reporting

Please select the one below that is the best fit for your research. If you are not sure, read the appropriate sections before making your selection.

☒ Life sciences ☐ Behavioural & social sciences ☐ Ecological, evolutionary & environmental sciences

For a reference copy of the document with all sections, see [nature.com/documents/nr-reporting-summary-flat.pdf](https://www.nature.com/documents/nr-reporting-summary-flat.pdf)

## Life sciences study design

All studies must disclose on these points even when the disclosure is negative.

|                 |                                                                                                                                                                                                                                                                                                                                                                                                                                                                                                                                           |
|-----------------|-------------------------------------------------------------------------------------------------------------------------------------------------------------------------------------------------------------------------------------------------------------------------------------------------------------------------------------------------------------------------------------------------------------------------------------------------------------------------------------------------------------------------------------------|
| Sample size     | No statistical method was used to predetermine sample size. Instead, sample size was selected based on prior experience to maximize the ability to find statistically significant and meaningful differences between groups when experiments were replicated multiple times.                                                                                                                                                                                                                                                              |
| Data exclusions | No data were excluded from analysis.                                                                                                                                                                                                                                                                                                                                                                                                                                                                                                      |
| Replication     | All experiments were performed independently at least three times with the exception of the murine osteomyelitis model which was performed a single time. All attempts at replication were successful. The murine osteomyelitis experiment was done a single time in accordance with the principles of animal ethics, namely Replacement, Reduction, and Refinement. A single experiment was performed so as to reduce the number of vertebrate animals used as the experiment was done to confirm findings from a separate animal model. |
| Randomization   | Mice were randomly assigned their treatment group.                                                                                                                                                                                                                                                                                                                                                                                                                                                                                        |
| Blinding        | Blinding was not relevant/not possible to this study as it did not involve interventions on an experimental group and did not involve interventions/outcomes that could be blinded.                                                                                                                                                                                                                                                                                                                                                       |

## Reporting for specific materials, systems and methods

We require information from authors about some types of materials, experimental systems and methods used in many studies. Here, indicate whether each material, system or method listed is relevant to your study. If you are not sure if a list item applies to your research, read the appropriate section before selecting a response.

### Materials & experimental systems

| n/a                                 | Involved in the study                                           |
|-------------------------------------|-----------------------------------------------------------------|
| <input checked="" type="checkbox"/> | <input type="checkbox"/> Antibodies                             |
| <input checked="" type="checkbox"/> | <input type="checkbox"/> Eukaryotic cell lines                  |
| <input checked="" type="checkbox"/> | <input type="checkbox"/> Palaeontology and archaeology          |
| <input type="checkbox"/>            | <input checked="" type="checkbox"/> Animals and other organisms |
| <input checked="" type="checkbox"/> | <input type="checkbox"/> Clinical data                          |
| <input checked="" type="checkbox"/> | <input type="checkbox"/> Dual use research of concern           |
| <input checked="" type="checkbox"/> | <input type="checkbox"/> Plants                                 |

### Methods

| n/a                                 | Involved in the study                           |
|-------------------------------------|-------------------------------------------------|
| <input checked="" type="checkbox"/> | <input type="checkbox"/> ChIP-seq               |
| <input checked="" type="checkbox"/> | <input type="checkbox"/> Flow cytometry         |
| <input checked="" type="checkbox"/> | <input type="checkbox"/> MRI-based neuroimaging |

## Animals and other research organisms

Policy information about [studies involving animals](#); [ARRIVE guidelines](#) recommended for reporting animal research, and [Sex and Gender in Research](#)

|                         |                                                                                                                                                                                                                                                                                                                                                                                                                                                                        |
|-------------------------|------------------------------------------------------------------------------------------------------------------------------------------------------------------------------------------------------------------------------------------------------------------------------------------------------------------------------------------------------------------------------------------------------------------------------------------------------------------------|
| Laboratory animals      | C57BL/6 male and female mice (6-8 weeks old Jackson Laboratories) were used in this study. Mice were housed at Vanderbilt University Medical Center Animal facility with temperature between 69-75 degree Fahrenheit and humidity between 30-70%. A 12 hour light-dark cycle was maintained. Mice were housed in groups of five with free access to autoclaved water and food. All experimental manipulations were performed in a biosafety level 2 laminar flow hood. |
| Wild animals            | The study did not involve wild animals                                                                                                                                                                                                                                                                                                                                                                                                                                 |
| Reporting on sex        | Both male and female mice were used in this study, and sex was considered in study design. Sex-based analysis was done where appropriate, and both aggregated and disaggregated data are presented in this paper.                                                                                                                                                                                                                                                      |
| Field-collected samples | This study did not involve any field-collected samples                                                                                                                                                                                                                                                                                                                                                                                                                 |
| Ethics oversight        | This study was approved by the VUMC Institutional Animal Care and Use Committee under protocol M1900043-01.                                                                                                                                                                                                                                                                                                                                                            |

Note that full information on the approval of the study protocol must also be provided in the manuscript.

## Plants

|                       |                            |
|-----------------------|----------------------------|
| Seed stocks           | N/A. plants were not used. |
| Novel plant genotypes | N/A                        |
| Authentication        | N/A                        |
